# Supplementary material for: Investigating Suicide-Related Subliminal Messages on Instagram
Source: Atypon-hosted journal article supplement (doi:10.1027/0227-5910/a000717), 2020-10-09
Supplement: 0227-5910_a000717_esm1.pdf [file 0227-5910_a000717_esm1.pdf]

## Electronic Supplementary Material 1

Reliabilities were acceptable as indicated by Krippendorff's alphas.

(1)  $\geq 1,000$  ms: cutting ( $\alpha = 0.65$ ), firearm ( $\alpha = 0.65$ ), poisoning ( $\alpha = 0.98$ ), jumping ( $\alpha = 1.00$ ), drowning ( $\alpha = 1.00$ ), hanging ( $\alpha = 1.00$ ), transportation ( $\alpha = 1.00$ ).

(2)  $< 1,000$  ms: cutting ( $\alpha = 0.86$ ), firearm ( $\alpha = 1.00$ ), poisoning ( $\alpha = 1.00$ ), jumping ( $\alpha = 1.00$ ), drowning ( $\alpha = 1.00$ ), hanging ( $\alpha = 1.00$ ), transportation ( $\alpha = 1.00$ ).

(3)  $< 300$  ms: cutting ( $\alpha = 1.00$ ), firearm ( $\alpha = 1.00$ ), poisoning ( $\alpha = 1.00$ ), jumping ( $\alpha = 1.00$ ), drowning ( $\alpha = 1.00$ ), hanging ( $\alpha = 1.00$ ), transportation ( $\alpha = 1.00$ ).

(4)  $< 200$  ms: cutting ( $\alpha = 0.97$ ), firearm ( $\alpha = 1.00$ ), poisoning ( $\alpha = 1.00$ ), jumping ( $\alpha = 1.00$ ), drowning ( $\alpha = 1.00$ ), hanging ( $\alpha = 1.00$ ), transportation ( $\alpha = 1.00$ ).

(5)  $< 100$  ms: cutting ( $\alpha = 0.97$ ), firearm ( $\alpha = 1.00$ ), poisoning ( $\alpha = 1.00$ ), jumping ( $\alpha = 1.00$ ), drowning ( $\alpha = 1.00$ ), hanging ( $\alpha = 1.00$ ), transportation ( $\alpha = 1.00$ ).

Note. When there was no variation in a given variable (e.g., no shots within a given duration category within the sample of the reliability analysis), an  $\alpha$ -value of 1.00 indicates a 100% coding agreement.
