# Supplementary material for: Investigating Suicide-Related Subliminal Messages on Instagram
Source: Atypon-hosted journal article supplement (doi:10.1027/0227-5910/a000717), 2020-10-09
Supplement: 0227-5910_a000717_esm2.pdf [file 0227-5910_a000717_esm2.pdf]

**Electronic Supplementary Material 2**

Table E1. *Descriptive Statistics (Means and Standard Deviations) of the Number of Shots Within a Given Duration of a Shot Category*

---

| <b>Method</b>         | <b>Duration of Shot</b> |                    |                  |                  |                  |
|-----------------------|-------------------------|--------------------|------------------|------------------|------------------|
|                       | $\geq 1,000\text{ms}$   | $< 1,000\text{ms}$ | $< 300\text{ms}$ | $< 200\text{ms}$ | $< 100\text{ms}$ |
| <b>Cutting</b>        |                         |                    |                  |                  |                  |
| M                     | 0.16                    | 0.32               | 0.10             | 0.10             | 0.10             |
| SD                    | 0.55                    | 0.74               | 0.46             | 0.50             | 0.60             |
| <b>Firearm</b>        |                         |                    |                  |                  |                  |
| M                     | 0.14                    | 0.27               | 0.04             | 0.02             | 0.00             |
| SD                    | 0.51                    | 1.01               | 0.24             | 0.14             | 0.00             |
| <b>Poisoning</b>      |                         |                    |                  |                  |                  |
| M                     | 0.10                    | 0.31               | 0.04             | 0.01             | 0.07             |
| SD                    | 0.36                    | 0.94               | 0.24             | 0.10             | 0.46             |
| <b>Jumping</b>        |                         |                    |                  |                  |                  |
| M                     | 0.13                    | 0.21               | 0.04             | 0.04             | 0.00             |
| SD                    | 0.42                    | 0.59               | 0.24             | 0.20             | 0.00             |
| <b>Drowning</b>       |                         |                    |                  |                  |                  |
| M                     | 0.03                    | 0.04               | 0.00             | 0.03             | 0.00             |
| SD                    | 0.17                    | 0.20               | 0.00             | 0.17             | 0.00             |
| <b>Hanging</b>        |                         |                    |                  |                  |                  |
| M                     | 0.06                    | 0.05               | 0.05             | 0.00             | 0.01             |
| SD                    | 0.24                    | 0.26               | 0.22             | 0.00             | 0.10             |
| <b>Transportation</b> |                         |                    |                  |                  |                  |
| M                     | 0.01                    | 0.08               | 0.00             | 0.02             | 0.00             |
| SD                    | 0.10                    | 0.34               | 0.00             | 0.14             | 0.00             |

---
