# Supplementary material for: Investigating Suicide-Related Subliminal Messages on Instagram
Source: Atypon-hosted journal article supplement (doi:10.1027/0227-5910/a000717), 2020-10-09
Supplement: 0227-5910_a000717_esm3.pdf [file 0227-5910_a000717_esm3.pdf]

Electronic Supplementary Material 3

Table.Frequency of word occurrence

| RANK | FREQ | WORD             |
|------|------|------------------|
| 1    | 88   | I                |
| 2    | 36   | you              |
| 3    | 26   | m                |
| 4    | 20   | me               |
| 5    | 20   | t                |
| 6    | 19   | to               |
| 7    | 16   | <i>fine</i>      |
| 8    | 15   | the              |
| 9    | 14   | ich              |
| 10   | 13   | du               |
| 11   | 13   | it               |
| 12   | 13   | so               |
| 13   | 11   | my               |
| 14   | 9    | can              |
| 15   | 9    | don              |
| 16   | 9    | <b>hate</b>      |
| 17   | 9    | in               |
| 18   | 9    | not              |
| 19   | 9    | sie              |
| 20   | 8    | is               |
| 21   | 8    | mean             |
| 22   | 8    | und              |
| 23   | 8    | zu               |
| 24   | 7    | a                |
| 25   | 7    | and              |
| 26   | 7    | do               |
| 27   | 7    | <i>help</i>      |
| 28   | 7    | know             |
| 29   | 7    | <i>love</i>      |
| 30   | 7    | mich             |
| 31   | 7    | re               |
| 32   | 7    | was              |
| 33   | 6    | about            |
| 34   | 6    | ja               |
| 35   | 6    | <b>lonely</b>    |
| 36   | 6    | nicht            |
| 37   | 6    | <b>tired</b>     |
| 38   | 6    | what             |
| 39   | 5    | all              |
| 40   | 5    | be               |
| 41   | 5    | been             |
| 42   | 5    | <b>die</b>       |
| 43   | 5    | doch             |
| 44   | 5    | for              |
| 45   | 5    | habe             |
| 46   | 5    | how              |
| 47   | 5    | just             |
| 48   | 5    | no               |
| 49   | 5    | okay             |
| 50   | 5    | s                |
| 51   | 5    | <b>suicidal</b>  |
| 52   | 5    | <b>suicide</b>   |
| 53   | 5    | that             |
| 54   | 5    | up               |
| 55   | 5    | ve               |
| 56   | 5    | wanna            |
| 57   | 4    | <b>alone</b>     |
| 58   | 4    | anymore          |
| 59   | 4    | auf              |
| 60   | 4    | because          |
| 61   | 4    | <b>broken</b>    |
| 62   | 4    | es               |
| 63   | 4    | get              |
| 64   | 4    | <i>good</i>      |
| 65   | 4    | hast             |
| 66   | 4    | ihr              |
| 67   | 4    | keine            |
| 68   | 4    | <i>leben</i>     |
| 69   | 4    | of               |
| 70   | 4    | think            |
| 71   | 4    | time             |
| 72   | 4    | <b>worthless</b> |
| 73   | 4    | yes              |
| 74   | 3    | <b>afraid</b>    |
| 75   | 3    | again            |
| 76   | 3    | am               |
| 77   | 3    | are              |
| 78   | 3    | <b>beenden</b>   |
| 79   | 3    | bin              |
| 80   | 3    | das              |
| 81   | 3    | <b>dead</b>      |
| 82   | 3    | der              |
| 83   | 3    | dich             |
| 84   | 3    | emotional        |
| 85   | 3    | have             |
| 86   | 3    | her              |
| 87   | 3    | like             |
| 88   | 3    | <i>live</i>      |
| 89   | 3    | mind             |
| 90   | 3    | nothing          |
| 91   | 3    | now              |
| 92   | 3    | ok               |
| 93   | 3    | one              |
| 94   | 3    | <b>pain</b>      |
| 95   | 3    | reason           |
| 96   | 3    | something        |
| 97   | 3    | they             |
| 98   | 3    | <b>ugly</b>      |
| 99   | 3    | want             |
| 100  | 3    | wanted           |
| 101  | 3    | we               |
| 102  | 3    | will             |
| 103  | 3    | with             |

Note. This table presents all words that appeared a minimum of three times throughout all video posts.

Positively- and negatively-valenced words that are mentioned in the body of the text are highlighted with the color grey. Negatively-valenced words are additionally highlighted with bold font and positively-valenced words are italicized.

English Translation of German words: ich (I), du (you), sie (she, they), und (and), zu (to, toward), mich (me), ja (yes), nicht (not), doch (still, however), habe (have), auf (up), es (it), hast (have), ihr (her), keine (none), leben (live), beenden (to end something), bin (am), das (the), der (the), dich (you).

<https://doi.org/10.1027/0227-5910/a000717>

Some concepts are represented only as fragments, e.g. with only one or two letters such as “t” or “re.” These entries should be seen in the context of other words (e.g., “don’t” or “you’re”).
